# Supplementary material for: Rapid Fabrication of MgNH4PO4·H2O/SrHPO4 Porous Composite Scaffolds with Improved Radiopacity via 3D Printing Process
Source: MDPI journal article supplement (doi:10.3390/biomedicines9091138), 2021-09-02
Supplement: s1 [file s1]

## Supporting Information

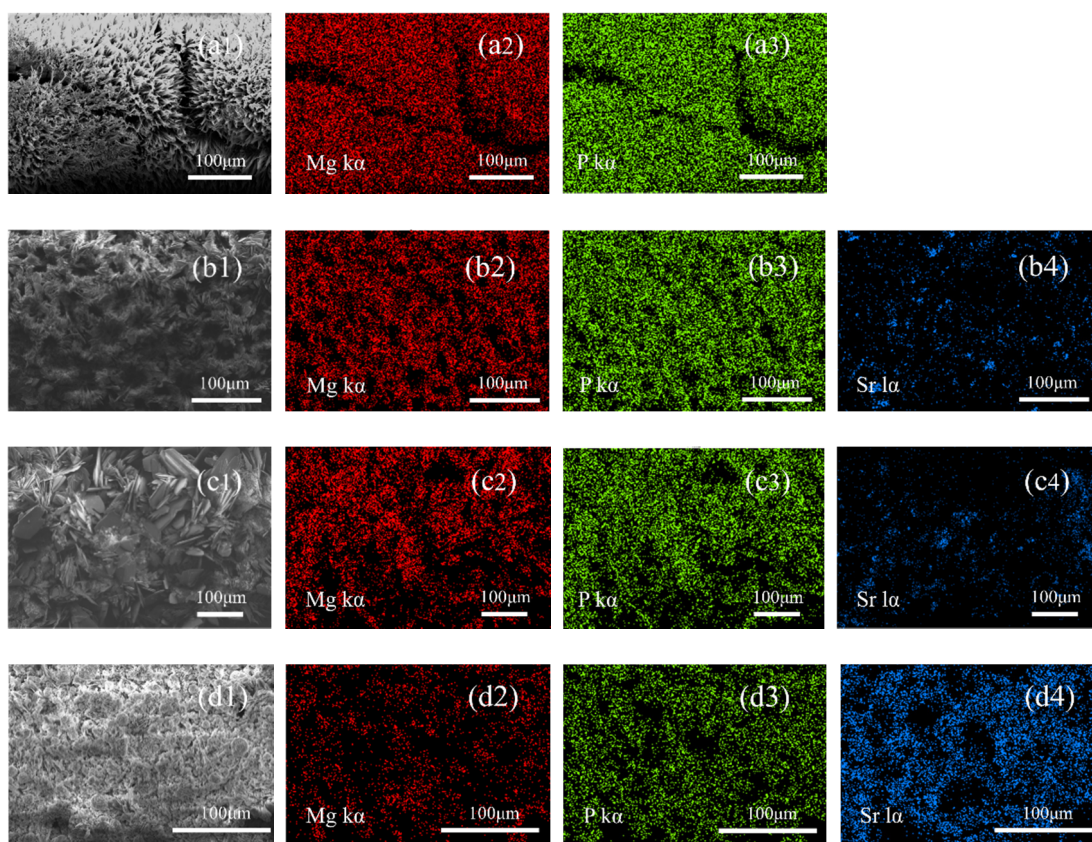

**Figure S1.** Surface morphologies and elemental mappings of the porous composite scaffolds S0, S1, S3, and S5, (a), (b), (c) and (d), respectively. SEM images (a1, b1, c1, and d1); Mg element (a2, b2, c2, and d2); P element (a3, b3, c3, and d3); and Sr element (b4, c4, and d4).
